# Supplementary material
Source: MDPI journal article supplement (https://www.mdpi.com/2073-4352/12/12/1745)
Supplement: s1 [file s1]

*Supporting Information for*

**Structural and spectroscopic features of the bixbyite-type yttrium  
scandate doped by rare-earth ions**

Elena Dobretsova\*, Olimkhon Alimov, Denis Guryev, Valery Voronov, Sergey Rusanov, Vitaly Kashin, Sergey Kutovoy, Viktor Vlasov, Lubov Badyanova, Ivan Novikov and Vladimir Tsvetkov

*<sup>a</sup>Prokhorov General Physics Institute of the Russian Academy of Sciences, 119991 Moscow, Russia.*

*\*Email: elenadobretsova89@gmail.com, eadobr@kapella.gpi.ru*

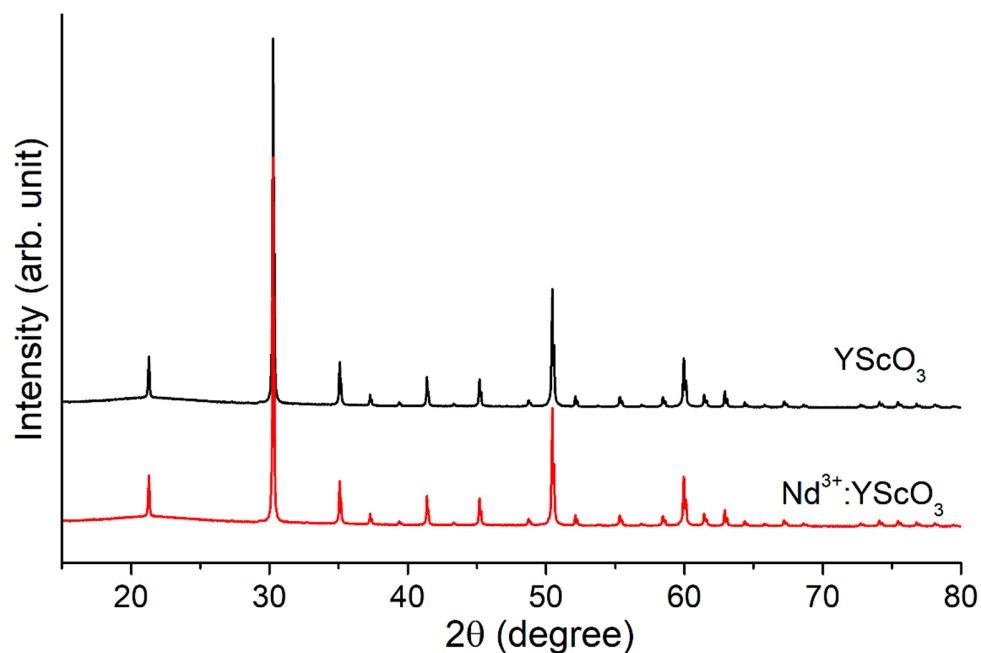

Figure S1. The X-ray pattern of  $\text{YScO}_3$  and  $\text{Nd}^{3+}:\text{YScO}_3$  crystal fibers (black and red ones, respectively).

Table S1. Miller indices ( $hkl$ ), interplanar distances  $d$ , and Bragg angles  $2\theta$  of the pure and  $\text{Nd}^{3+}$ -doped  $\text{YScO}_3$  crystal fibers with a bixbyite-type structure

| $hkl$ | $m$ | $\text{YScO}_3$ , $a = 10.228(1) \text{ \AA}$ |           | $\text{Nd}^{3+}:\text{YScO}_3$ , $a = 10.224(1) \text{ \AA}$ |           |
|-------|-----|-----------------------------------------------|-----------|--------------------------------------------------------------|-----------|
|       |     | $d$                                           | $2\theta$ | $d$                                                          | $2\theta$ |
| 211   | 24  | 4.1756                                        | 21.261    | 4.1738                                                       | 21.271    |
| 222   | 8   | 2.9526                                        | 30.246    | 2.9513                                                       | 30.259    |
| 004   | 6   | 2.5570                                        | 35.065    | 2.5559                                                       | 35.081    |
| 411   | 24  | 2.4108                                        | 37.268    | 2.4097                                                       | 37.285    |
| 332   | 24  | 2.1806                                        | 41.372    | 2.1797                                                       | 41.391    |
| 341   | 24  | 2.0059                                        | 45.166    | 2.0050                                                       | 45.186    |
| 251   | 24  | 1.8674                                        | 48.724    | 1.8666                                                       | 48.747    |
| 044   | 12  | 1.8081                                        | 50.432    | 1.80730                                                      | 50.455    |
| 433   | 24  | 1.7541                                        | 52.098    | 1.75334                                                      | 52.123    |
| 611   | 24  | 1.6592                                        | 55.324    | 1.65849                                                      | 55.350    |
| 541   | 24  | 1.5782                                        | 58.429    | 1.57754                                                      | 58.457    |
| 622   | 24  | 1.5419                                        | 59.942    | 1.54127                                                      | 59.971    |
| 631   | 24  | 1.5081                                        | 61.433    | 1.50739                                                      | 61.463    |
| 444   | 8   | 1.4763                                        | 62.903    | 1.47565                                                      | 62.934    |
| 721   | 24  | 1.3919                                        | 67.205    | 1.39126                                                      | 67.238    |
| 008   | 6   | 1.2785                                        | 74.098    | 1.27795                                                      | 74.136    |

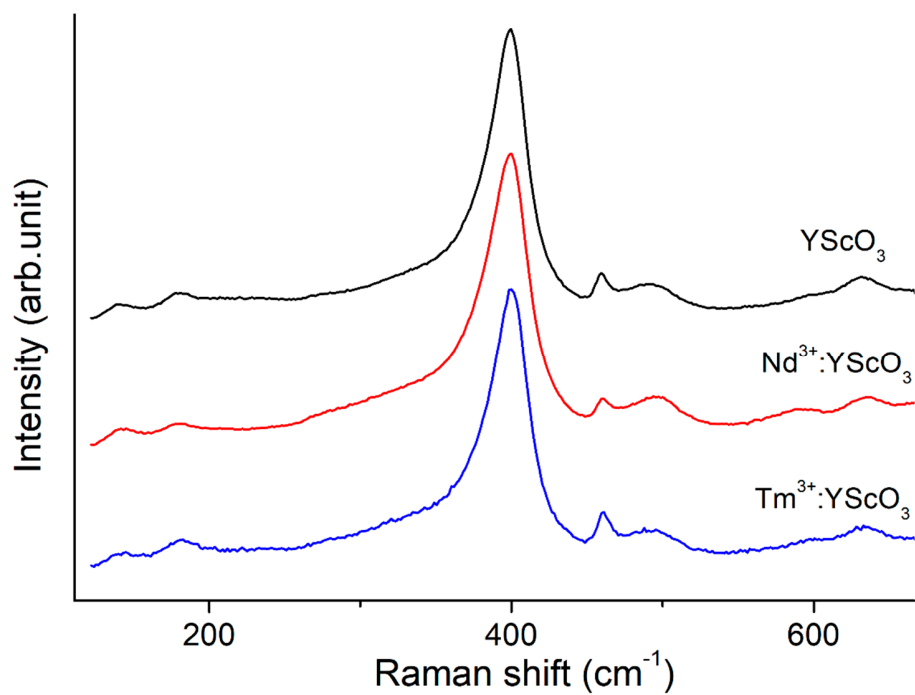

Figure S2. Micro-Raman spectra of YScO<sub>3</sub>, Nd<sup>3+</sup>:YScO<sub>3</sub>, and Tm<sup>3+</sup>:YScO<sub>3</sub> crystal fibers (black, red and blue ones, respectively).
